# Supplementary material for: Arborists and Urban Foresters Support for Urban Wildlife and Habitat Sustainability: Results of an Urban Ecology-Focused Survey of Arborists
Source: MDPI journal article supplement (doi:10.3390/su142315962), 2022-11-30
Supplement: s1 [file s1]

**Supplemental File 1: Survey Questions**

| Question                                                                                                          | Answer Type                                                                                                                                                                                |
|-------------------------------------------------------------------------------------------------------------------|--------------------------------------------------------------------------------------------------------------------------------------------------------------------------------------------|
| <b>Background Questions</b>                                                                                       |                                                                                                                                                                                            |
| How many years have you worked in the tree care industry?                                                         | Categorical (4 opt.)                                                                                                                                                                       |
| Please indicate the type of organization that you have primarily worked for.                                      | Categorical (6 opt., 1 open text)                                                                                                                                                          |
| What certifications or licenses do you currently hold?                                                            | Categorical (16 multiple choice, 1 open text)                                                                                                                                              |
| Have you taken the International Society of Arboriculture (ISA) Tree Risk Assessment Qualification (TRAQ) course? | Yes, No, or "Something similar"                                                                                                                                                            |
| <b>Demographics</b>                                                                                               |                                                                                                                                                                                            |
| What is your age?                                                                                                 | Categorical (8 opt.)                                                                                                                                                                       |
| What is your primary job position?                                                                                | Ground worker, tree climber, aerial lift (bucket truck) operator, consulting arborist, pesticide applicator, urban forestry technician, supervisor, business owner, other (text box entry) |
| What is your annual income? (USD)                                                                                 | Ordinal (8 opt.)                                                                                                                                                                           |
| What is the highest education level you have attained?                                                            | Categorical (8 opt.)                                                                                                                                                                       |
| What gender do you identify with?                                                                                 |                                                                                                                                                                                            |
| Where were you born?                                                                                              |                                                                                                                                                                                            |
| In which country do you currently practice arboriculture?                                                         |                                                                                                                                                                                            |
| <b>Perceptions of Wildlife Support Mechanisms</b>                                                                 |                                                                                                                                                                                            |
| What do you think arborists can do to support wildlife in the urban forest?                                       |                                                                                                                                                                                            |
| What factors most influence your decision to recommend that clients retain dead trees for wildlife?               |                                                                                                                                                                                            |
